# Supplementary material for: Is e-cigarette use associated with coronary heart disease and myocardial infarction? Insights from the 2016 and 2017 National Health Interview Surveys
Source: PubMed Central journal article supplement — Ther Adv Chronic Dis. 2019 Sep 27;10:2040622319877741. doi: 10.1177/2040622319877741 (PMC6767743; doi:10.1177/2040622319877741), 2019-09-27
Supplement: Supplementary_Table_1_8.pdf [file Supplementary_Table_1_8.pdf]

**Supplementary table 1.** Logistic regression analyses of the association between e-cigarette use and myocardial infarction using different cutoff points for smoking cessation duration of former smokers, NHIS 2016 and 2017 (pooled). Independent variables were age, gender, race-ethnicity, body-mass index, hypertension, hypercholesterolemia, diabetes and smoking status. For smoking status, former smokers were subclassified according to quit duration of 7 years, 8 years and 10 years.

| <b>Myocardial infarction<br/>(2016 and 2017 NHIS-pooled)</b>  | <b>Former smokers of <math>\leq 7</math> years and<br/>&gt; 7 years</b> |               |                | <b>Former smokers of <math>\leq 8</math> years and<br/>&gt; 8 years</b> |               |                | <b>Former smokers of <math>\leq 10</math> years<br/>and &gt; 10 years</b> |               |                |
|---------------------------------------------------------------|-------------------------------------------------------------------------|---------------|----------------|-------------------------------------------------------------------------|---------------|----------------|---------------------------------------------------------------------------|---------------|----------------|
|                                                               | <b>OR</b>                                                               | <b>95% CI</b> | <b>P value</b> | <b>OR</b>                                                               | <b>95% CI</b> | <b>P value</b> | <b>OR</b>                                                                 | <b>95% CI</b> | <b>P value</b> |
| E-cigarette use                                               |                                                                         |               |                |                                                                         |               |                |                                                                           |               |                |
| Never (referent)                                              |                                                                         |               |                |                                                                         |               |                |                                                                           |               |                |
| Daily                                                         | 1.34                                                                    | 0.80-2.27     | 0.268          | 1.31                                                                    | 0.78-2.21     | 0.304          | 1.39                                                                      | 0.82-2.33     | 0.218          |
| Some days                                                     | 1.23                                                                    | 0.79-1.91     | 0.368          | 1.22                                                                    | 0.78-1.90     | 0.381          | 1.23                                                                      | 0.79-1.92     | 0.353          |
| Former                                                        | 0.96                                                                    | 0.77-1.20     | 0.724          | 0.96                                                                    | 0.77-1.19     | 0.682          | 0.97                                                                      | 0.78-1.21     | 0.801          |
|                                                               |                                                                         |               |                |                                                                         |               |                |                                                                           |               |                |
| <b>Coronary heart disease<br/>(2016 and 2017 NHIS-pooled)</b> | <b>Former smokers of <math>\leq 7</math> years vs. &gt;<br/>7 years</b> |               |                | <b>Former smokers of <math>\leq 8</math> years vs. &gt;<br/>8 years</b> |               |                | <b>Former smokers of <math>\leq 10</math> years vs.<br/>&gt; 10 years</b> |               |                |
|                                                               | <b>OR</b>                                                               | <b>95% CI</b> | <b>P value</b> | <b>OR</b>                                                               | <b>95% CI</b> | <b>P value</b> | <b>OR</b>                                                                 | <b>95% CI</b> | <b>P value</b> |
| E-cigarette use                                               |                                                                         |               |                |                                                                         |               |                |                                                                           |               |                |
| Never (referent)                                              |                                                                         |               |                |                                                                         |               |                |                                                                           |               |                |
| Daily                                                         | 1.33                                                                    | 0.80-2.20     | 0.270          | 1.32                                                                    | 0.80-2.19     | 0.276          | 1.33                                                                      | 0.80-2.20     | 0.273          |
| Some days                                                     | 1.13                                                                    | 0.70-1.83     | 0.611          | 1.13                                                                    | 0.70-1.83     | 0.612          | 1.13                                                                      | 0.70-1.83     | 0.623          |
| Former                                                        | 1.04                                                                    | 0.84-1.28     | 0.736          | 1.04                                                                    | 0.84-1.28     | 0.736          | 1.04                                                                      | 0.84-1.28     | 0.748          |
